# Supplementary material for: Nano-plasmonic sensing for predicting fouling on a reverse osmosis membrane
Source: Research Square preprint supplement (doi:10.21203/rs.3.rs-6848061/v1), 2025-06-17
Supplement: Supplementary file 1 [file 6a44abe555591b91fa27bcd0.docx]

**Nano-plasmonic sensing for predicting fouling on a reverse osmosis membrane**

**Supplementary Information**

Noa Stein, Mahaveer Halakarni, Roy Bernstein*, Moshe Herzberg*

Department of Desalination and Water Treatment, Zuckerberg Institute for Water Research, The Jacob Blaustein Institutes for Desert Research, Ben-Gurion University of the Negev, Sede-Boqer Campus, 84990, Israel

*Corresponding authors

Moshe Herzberg, email: [herzberg@bgu.ac.il](mailto:herzberg@bgu.ac.il)

Roy Bernstein, email: [royber@bgu.ac.il](mailto:royber@bgu.ac.il)

Submitted to ***NPJ Clean Water*** on June 8, 2025

**
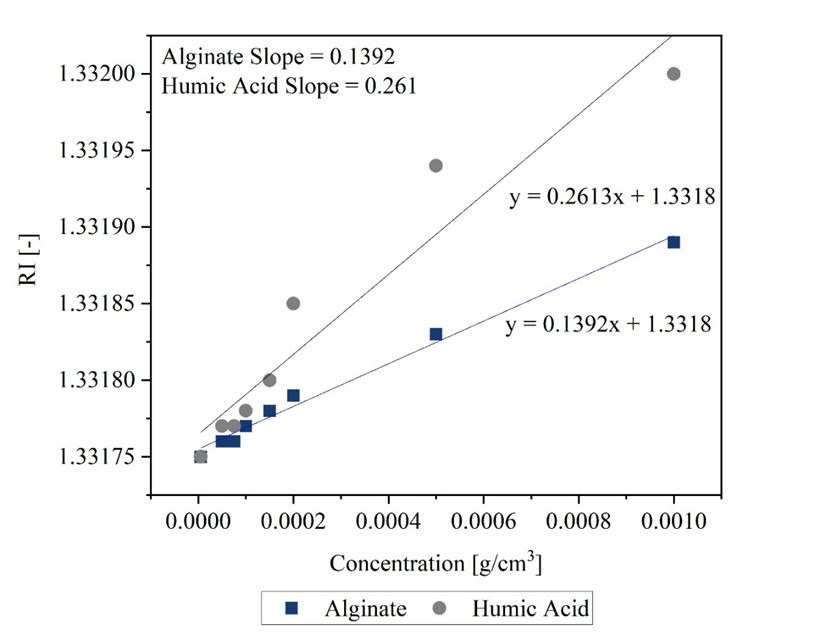
**

**Figure S1.** Refractive index (RI) increment, *dns/dc* [cm3/g] estimation for Alginate and Humic acid.


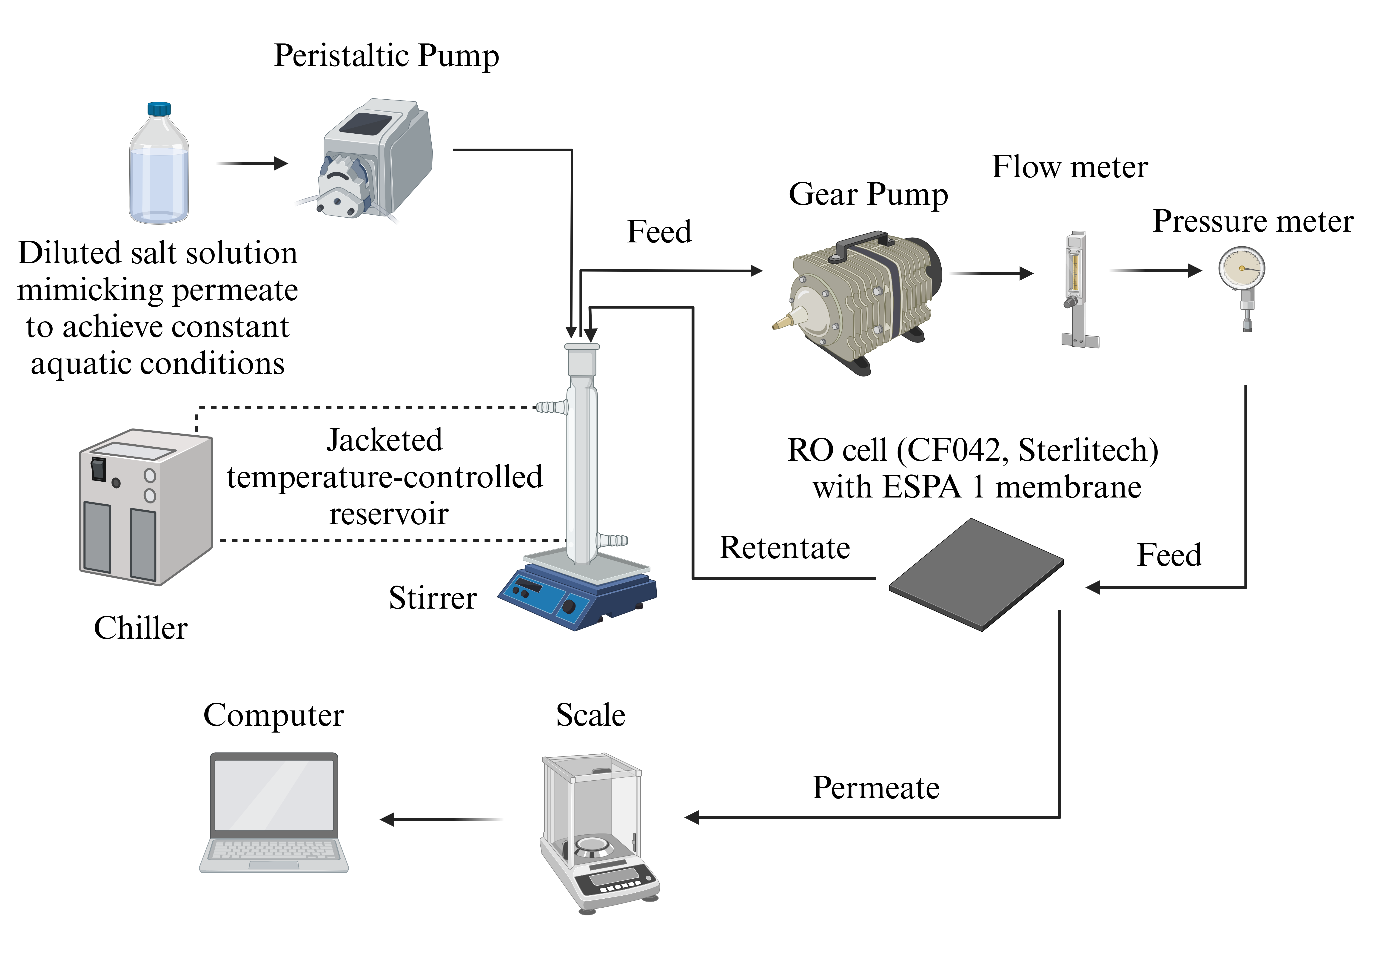


**Figure S2.** Overview of the laboratory-scaleRO crossflow secondary wastewater desalination system used for comparison of the fouling degree of each foulant.


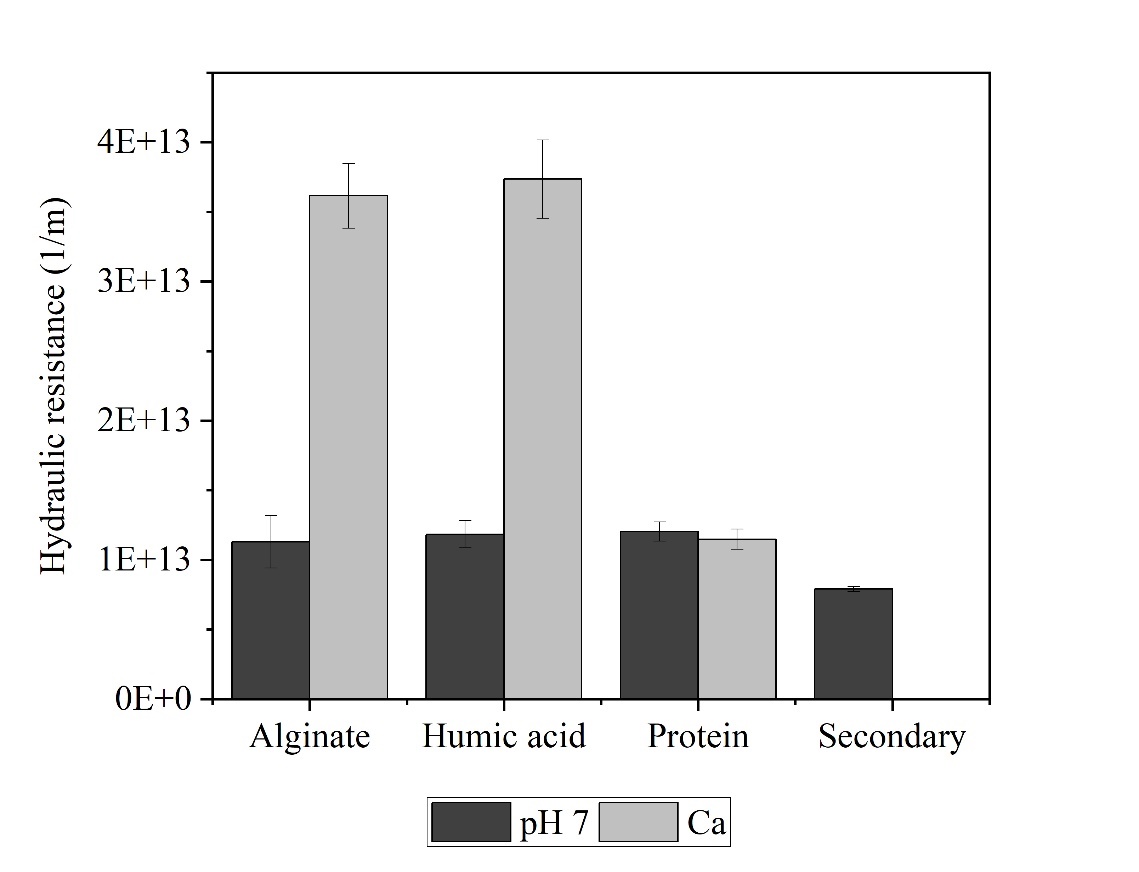


**Figure S3.** Hydraulic resistance of the fouling layers developed by three model foulants in 10 mM NaCl (pH 7) and 8.5 mM NaCl + 0.5 mM CaCl2 and that formed by secondary effluent.

**
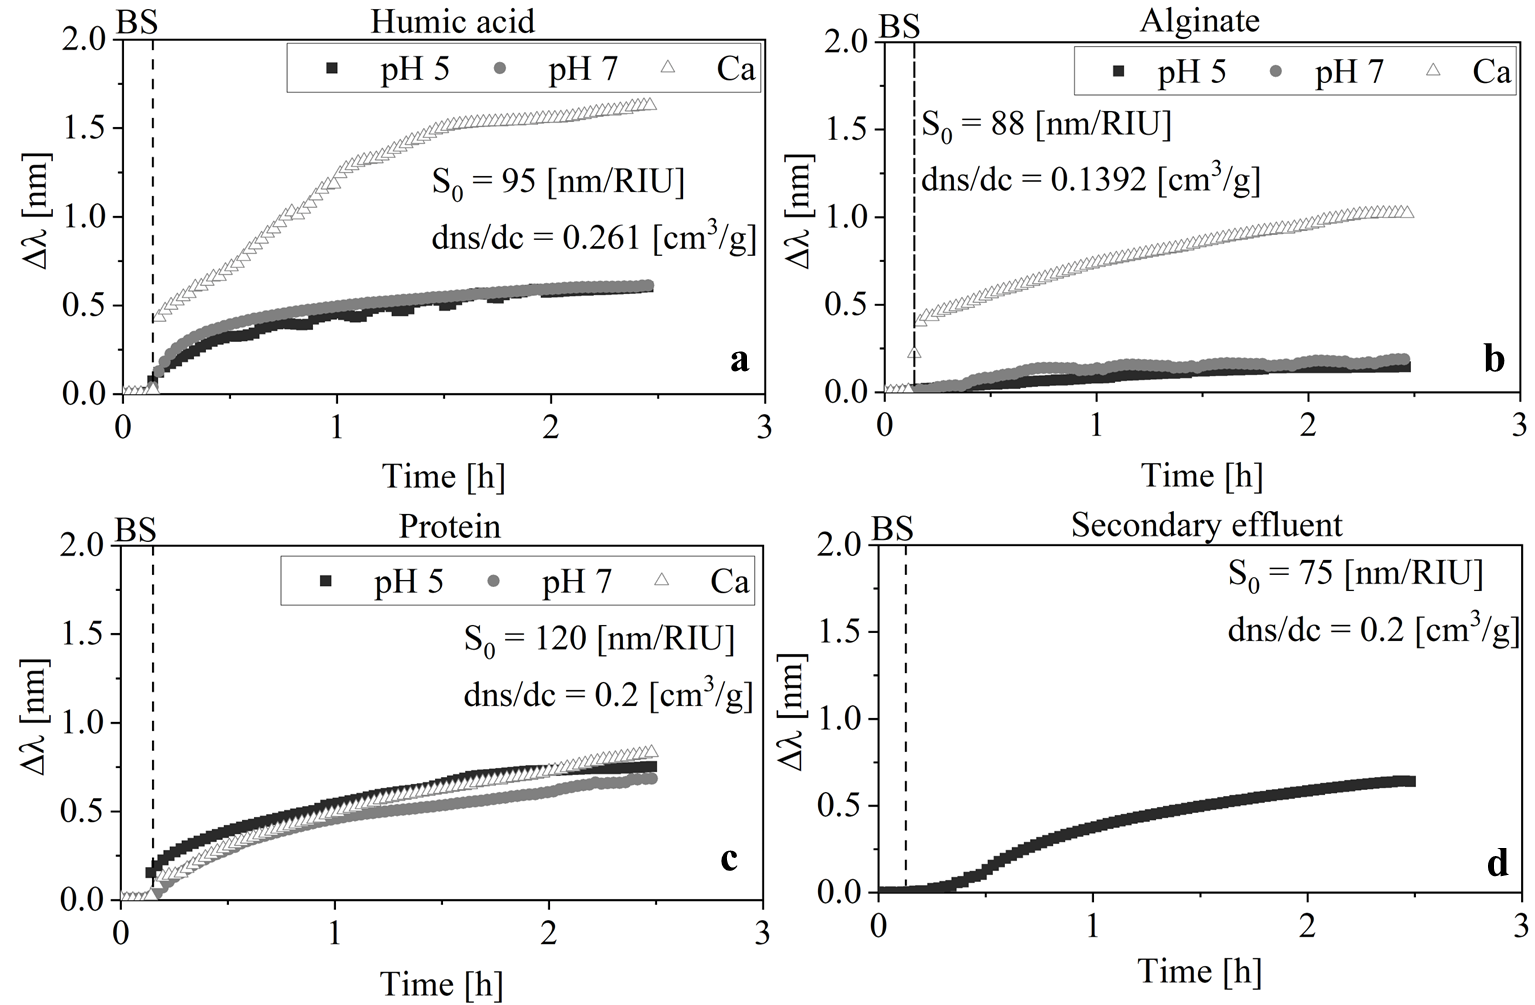
**

**Figure S4.** The shift in light-extinction maxima, Δλ [nm], over time, for three model foulants; **a**) Humic acid, **b**) Alginate, **c**) Athletes' Protein powder, and **d**) Secondary effluents dissolved organic matter accumulated on the surface of the LSPR membrane-mimetic sensor hosted in the XNano device (Insplorion AB, Gotenburg, Sweden) during 2 h adsorption period. Model foulants had a concentration of 100 mg/L (w/v), and secondary effluents had a TOC concentration of 10.73±0.203 mg/L.


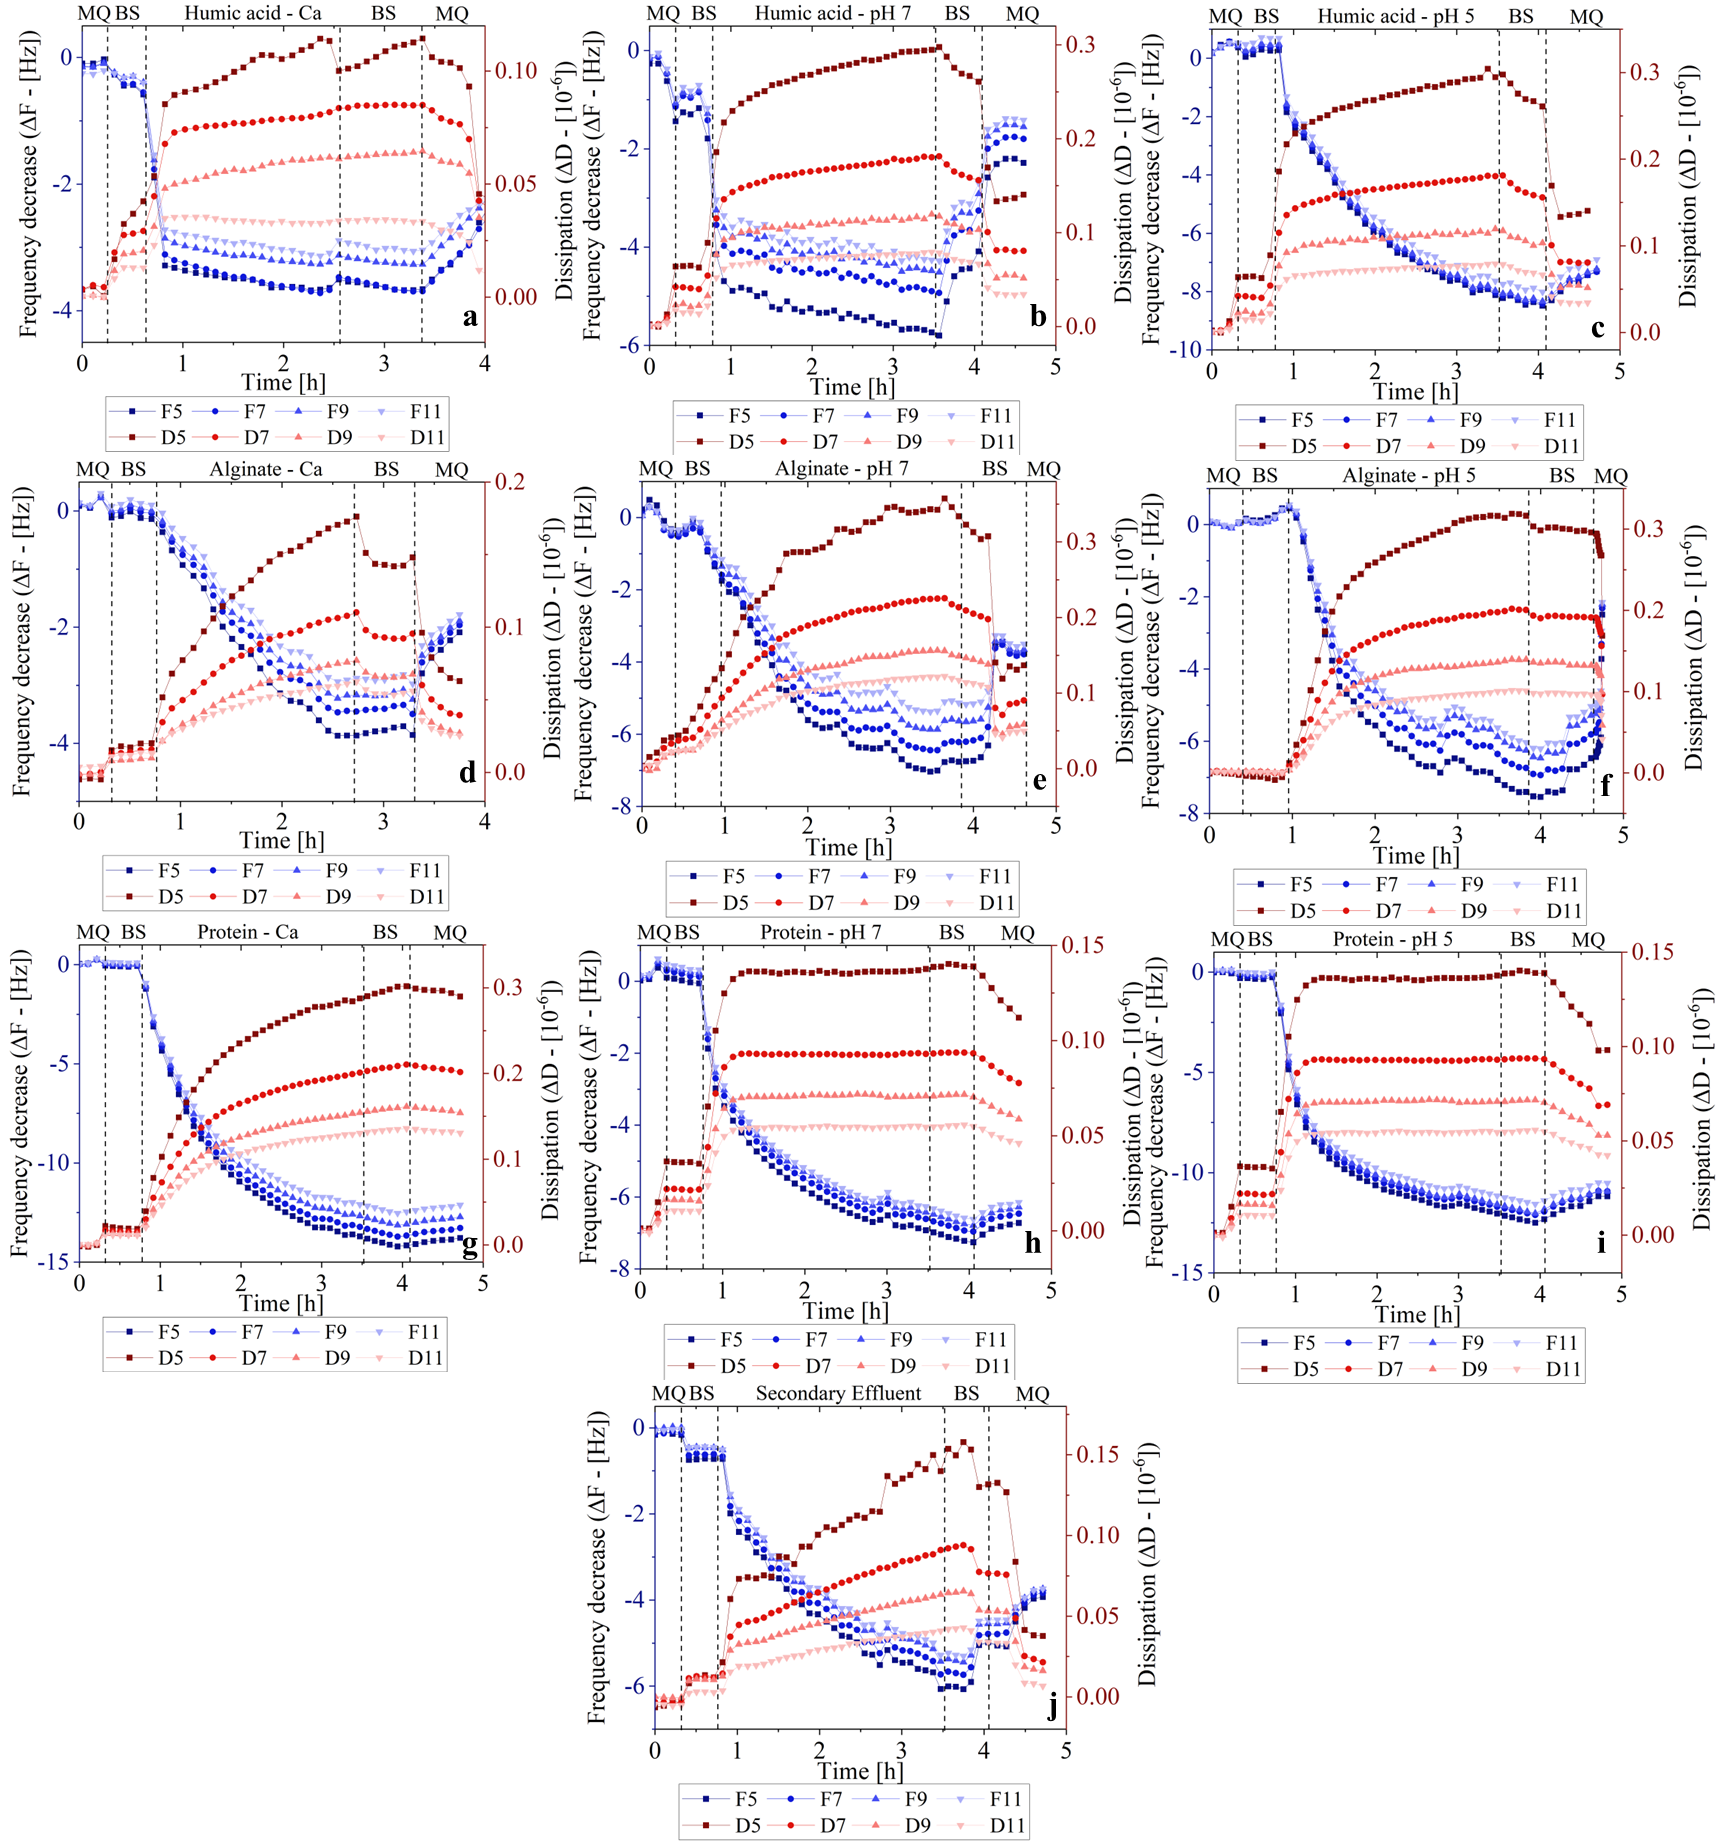


**Figure S5.** Adsorption of model foulants in the QCM-D on a PES coated sensor, under different aquatic conditions; **a)** Humic acid in 8.5mM NaCl + 0.5mM CaCl2; **b)** Humic acid in 10mM NaCl in pH 7; **c)** Humic acid in 10mM NaCl in pH 5; **d)** Alginate in 8.5mM NaCl + 0.5mM CaCl2; **e)** Alginate in 10mM NaCl in pH 7; **f)** Alginate in 10mM NaCl in pH 5; **g)** Athletes' Protein powder in 8.5mM NaCl + 0.5mM CaCl2; **h)** Athletes' Protein powder in 10mM NaCl in pH 7; **i)** Athletes' Protein powder in 10mM NaCl in pH 5; and **j)** dissolved organic matter of secondary effluents. Different overtones (5th, 7th, 9th & 11th) of the frequency and dissipation shifts are presented. The dashed line indicates a change in solution from background solution (BS) to different foulants and back to background solution. Model foulants had a concentration of 100 mg/L (w/v), and secondary effluents had a DOC concentration of 10.73±0.203 mg/L.

**Table S1.** Chemical characterization of secondary effluent from the Yeruham plant.

| Parameter | Value |
| --- | --- |
| TOC (mg/L) | 10.73 |
| pH | 7.74 |
| Alkalinity (mg/L) | 3.97 |
| Electric conductivity (µS/cm) | 1121 |
| Ca+2 (mg/L) | 41.7 |
| K+ (mg/L) | 17.9 |
| Mg+2 (mg/L) | 5.83 |
| Na+ (mg/L) | 144 |
| SO4-2 (mg/L) | 53.2 |
| NO3- (mg/L) | 21.3 |
| Cl- (mg/L) | 157 |
| P (mg/L) | 1.54 |

**Table S2.** Data of RO membrane fouling (permeate flux decline, fouling layer’s hydraulic resistance), SDI, QCM-D, and LSPR for Pearson t-test correlations

| **Foulant**  **Treatment** | | **RO flux**  **Decline**  **[%]** | **Mass surface**  **Concentration**  **[ng/cm2]** | **QCM-D ΔF decrease**  **(7th o.t.) [Hz]** | **QCM-D ΔF decrease**  **(5th o.t.) [Hz]** | **Hydrated mass - QCM-D model [ng/cm3]** | **Hydraulic**  **Resistance**  **[1/m]** | **SDI**  **[-]** |
| --- | --- | --- | --- | --- | --- | --- | --- | --- |
| Alginate | pH 5 | 9.07 | 38.26 | -5.18 | -6.98 | 138.4 | N.P. | 7.28 |
| pH 7 | 8.8 | 26.66 | -4.24 | -6.04 | 289.1 | 1.13E+13 | 6.35 |
| Ca | 38.78 | 129.45 | -1.15 | -2.95 | 129.5 | 3.62E+13 | 8.45 |
| Humic acid | pH 5 | 10.56 | 44.14 | -6.55 | -8.35 | 318.2 | N.P. | 7.2 |
| pH 7 | 5.44 | 38.32 | -2.22 | -4.02 | 131.3 | 1.18E+13 | 6.68 |
| Ca | 35.95 | 130.71 | -1.35 | -3.15 | 206.2 | 3.73E+13 | 7.69 |
| Protein powder | pH 5 | 14.66 | 83.39 | -10.07 | -11.87 | 246.1 | N.P. | 4.53 |
| pH 7 | 13.42 | 45.77 | -5.29 | -7.09 | 188.6 | 1.20E+13 | 6.99 |
| Ca | 12.44 | 46.08 | -11.86 | -13.66 | 415.8 | 1.15E+13 | 7.33 |
| Secondary effluents | - | 14.29 | 75.33 | -3.27 | -5.071 | 184.03 | 7.91E+12 | 4.12 |
